# Supplementary material for: Platelet ferroptosis promotes oxidized mtDNA release and SLE progression
Source: Research Square preprint supplement (doi:10.21203/rs.3.rs-7193492/v1), 2025-07-31
Supplement: Supplementary file 1 [file 0e69cfb66979d39139e65344.xlsx]

## Sheet: Sheet1
Variables	Groups
	HC	SLE
Patients/individuals (n)	23	37
Age (years) ± SD	30.18±4.35	37.03±12.71
Sex (Female/Male), (n)	Female, 22	Female, 36
Disease status
Active patients (SLEDAI-2K>6), n (%)		18(49%)
Inactive patients (SLEDAI-2K≤6), n (%)		19(51%)
Diagnosis based on joint involvement
Joint involvement		14(38%)
Non joint involvement		23(62%)
Diagnosis based on skin involvement
Skin involvement		12 (32%)
Non skin involvement		25(68%)
Diagnosis based on blood system involvement
Blood system involvement		20(54%)
Non blood system involvement		17 (46%)
Diagnosis based on nervous system involvement
Nervous system involvement		2 (5%)
Non nervous system involvement		35 (95%)
Diagnosis based on alopecia
With alopecia		2 (5%)
Without alopecia		35 (95%)
Diagnosis based on serositis
With serositis		5(14%)
Without serositis		32(86%)
