# Supplementary material for: Platelet ferroptosis promotes oxidized mtDNA release and SLE progression
Source: Research Square preprint supplement (doi:10.21203/rs.3.rs-7193492/v1), 2025-07-31
Supplement: Supplementary file 2 [file 1e14b9d20765ea725a01f68c.xlsx]

## Sheet: Sheet1
Clinical parameters	Data	GPX4 protein expression
	(Mean±SD）	r	P-value
SLEDAI-2K score	9.222±5.279	-0.6072	0.0008
Plasma oxidized DNA (pg/mL)	543.5±325.4	-0.4034	0.0244
Age（years）	37.03±12.71	-0.1824	0.2798
Platelet count（x10^9/L)	231.5±74.76	0.3723	0.0232
Platelet distribution width（fL)	15.74±0.9914	0.0576	0.7349
Mean platelet volume（fL)	9.346±1.185	-0.3109	0.0611
Large platelet ratio（%)	22.09±8.348	-0.3876	0.0178
Plateletcrit	0.2104±0.0524	0.3389	0.0432
Leukocyte count（x10^9/L)	5.478±2.089	0.2335	0.1642
Hemoglobin（g/L)	107.8±21.62	0.1209	0.4761
C3（g/L）	0.8688±0.2364	-0.2994	0.0854
C1q（ng/L）	168.9±35.92	0.002385	0.9895
C4（g/L）	0.1897±0.1025	-0.3801	0.0266
IgG（g/L)	13.81±4.861	0.06241	0.7259
IgA（g/L)	2.687±1.291	0.1387	0.4341
IgM（g/L)	1.022±0.5727	0.3359	0.0521
CRP（mg/L)	6.099±11.23	0.325	0.0531
ESR（mm/h）	29.94±23.58	0.1569	0.3755
Anti-dsDNA antibody（IU/mL)	45.67±89.63	0.08638	0.6621
Anti-SSA antibody（RU/mL)	760.1±933.4	0.1361	0.5075
Anti-SSB antibody（RU/mL)	441.3±1455	-0.009067	0.9777
Anti-Ro52 antibody（RU/mL)	784.1±1189	0.1098	0.5932
Anti-Sm antibody（RU/mL)	71.57±116.2	0.1701	0.5609
Anti-RNP antibody（RU/mL)	1168±1111	-0.0205	0.926
Anti-nucleosome antibody（RU/mL)	22.56±24.88	-0.1362	0.5355
Anti-mitochondrial M2 antibody（RU/mL)		0.4595	0.0734
	16.16±24.6
Anti-histone antibody（RU/mL)	281.9±777.3	0.6383	0.0643
24-hour urine protein（mg）	2980±4735	-0.5219	0.0381
D-dimer（g/L)	352.4±427.8	-0.02193	0.899
Fibrinogen（g/L)	3.012±0.8374	0.1624	0.3513
Cholesterol（mmol/L)	4.505±1.38	-0.285	0.1023
Triglyceride（mmol/L)	1.442±0.9413	-0.2898	0.0965
HDL（mmol/L)	1.218±0.3627	0.004024	0.982
LDL（mmol/L)	2.694±1.127	-0.28	0.1087
VLDL（mmol/L)	0.595±0.359	-0.2	0.2725
Apolipoprotein A（mmol/L)	1.316±0.2513	-0.1193	0.5786
Apolipoprotein B（mmol/L)	0.7975±0.3192	-0.3854	0.0629
