# Supplementary material for: Platelet ferroptosis promotes oxidized mtDNA release and SLE progression
Source: Research Square preprint supplement (doi:10.21203/rs.3.rs-7193492/v1), 2025-07-31
Supplement: Supplementary file 3 [file 8d9337e10419bffbd20809c6.docx]

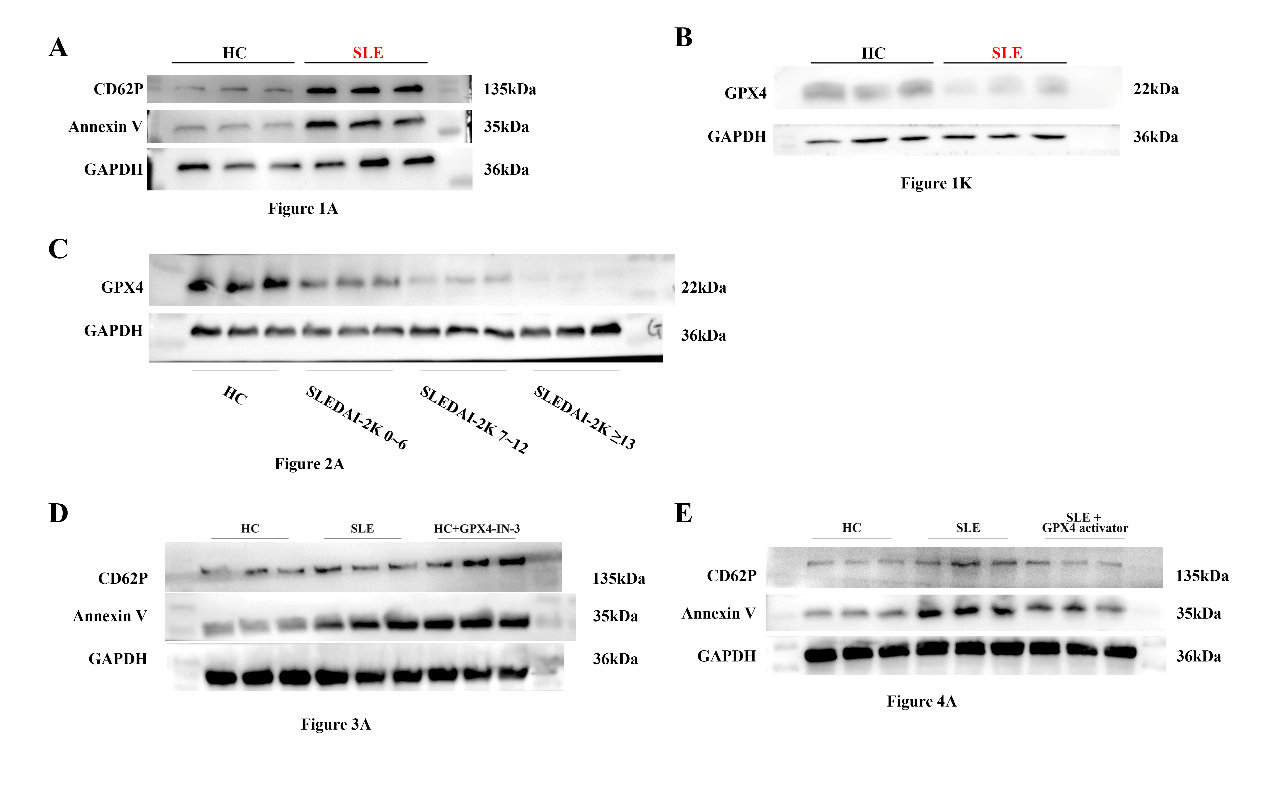
**Original western blots.**

**(A)** Original western blots of (Figure 1A). **(B)** Original western blots of (Figure 1K). **(C)** Original western blots of (Figure 2A). **(D)** Original western blots of (Figure 3A). **(E)** Original western blots of (Figure 4A).
